# Supplementary material
Source: MDPI journal article supplement (https://www.mdpi.com/2073-4344/8/10/418)
Supplement: s1 [file s1]

# Supplementary Materials: Influence of bio-oil phospholipid on the hydrodeoxygenation activity of NiMoS/Al<sub>2</sub>O<sub>3</sub> catalyst

Muhammad Abdus Salam, Derek Creaser, Prakhar Arora, Stefanie Tamm, Eva Lind Grennfelt and Louise Olsson

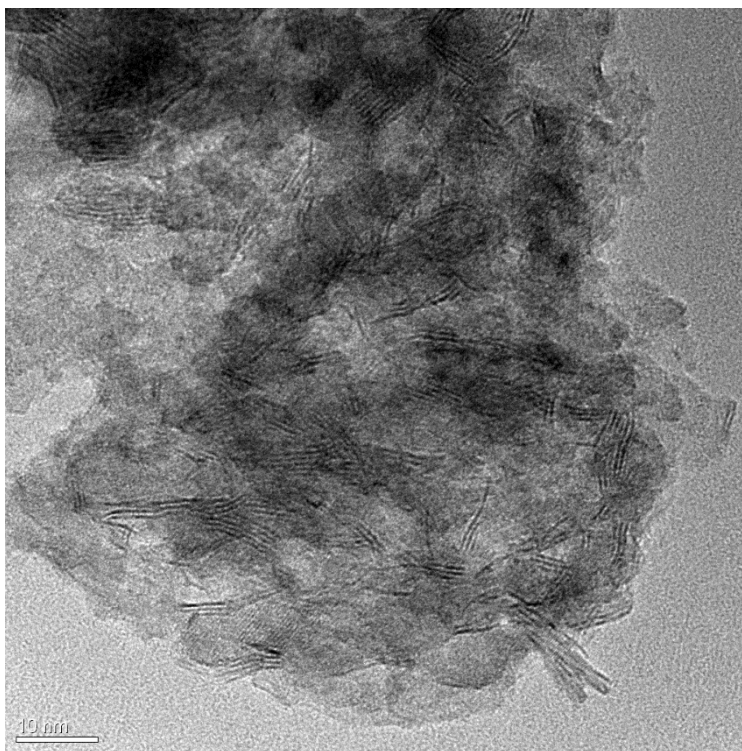

**Figure S1.** BF-TEM micrograph of the catalyst collected from the baseline experiment (NiMo\_0 PC) without PC.

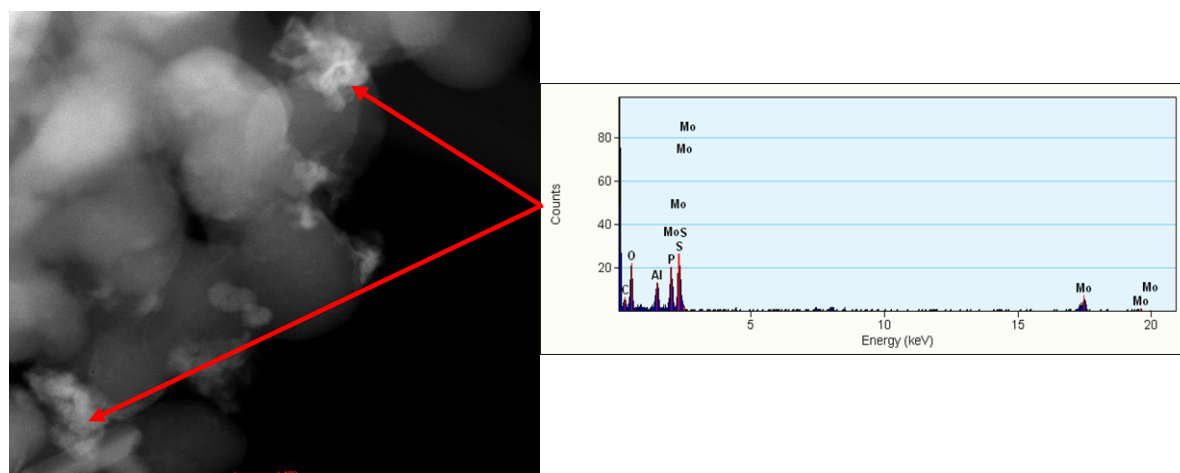

**Figure S2.** TEM-EDX data: The brighter areas show signal from Mo but no Ni.

**Table S1.** Measurement of carbon (C) and hydrogen (H) content (wt.%) of the recovered catalyst by TPO

| Catalyst      | Region A<br>(200-300°C) |     |     | Region B<br>(300-600 °C) |     |      | Total      |     |
|---------------|-------------------------|-----|-----|--------------------------|-----|------|------------|-----|
|               | C                       | H   | C/H | C                        | H   | C/H  | C          | H   |
| NiMo_0 PC     | 1.5                     | 0.6 | 2.5 | 3.1                      | 0.7 | 4.4  | <b>4.6</b> | 1.3 |
| NiMo_0.4PC    | 2.1                     | 0.5 | 4.2 | 3.4                      | 0.5 | 6.8  | <b>5.5</b> | 1.0 |
| NiMo_0.9 PC   | 2.1                     | 1.0 | 2.1 | 4.5                      | 0.9 | 5.0  | <b>6.6</b> | 1.9 |
| NiMo_1.3 PC   | 2.5                     | 0.7 | 3.6 | 5.2                      | 0.4 | 13.0 | <b>7.7</b> | 1.1 |
| NiMo_R_0 PC   | 2.3                     | 0.6 | 3.8 | 6.5                      | 0.4 | 16.3 | <b>8.8</b> | 1.0 |
| NiMo_R_0.4 PC | 2.2                     | 0.6 | 3.7 | 4.4                      | 0.6 | 7.3  | <b>6.6</b> | 1.2 |
